# Supplementary material for: Spectroscopic study of side-chain melting and crystallization of regioregular poly(3-dodecylthiophene)
Source: Royal Society of Chemistry journal article supplement (doi:10.1039/c2py00582d), 2012-01-01
Supplement: c2py00582d.pdf [file c2py00582d.pdf]

Supplementary Information

# Spectroscopic Evidence of Side-Chain Melting and Crystallization of Regioregular Poly(3-dodecylthiophene)

*Yan Guo, Ying Jin and Zhaohui Su\**

State Key Laboratory of Polymer Physics and Chemistry, Changchun Institute of Applied Chemistry,  
5625 Renmin Street, Jilin, Changchun 130022, People's Republic of China

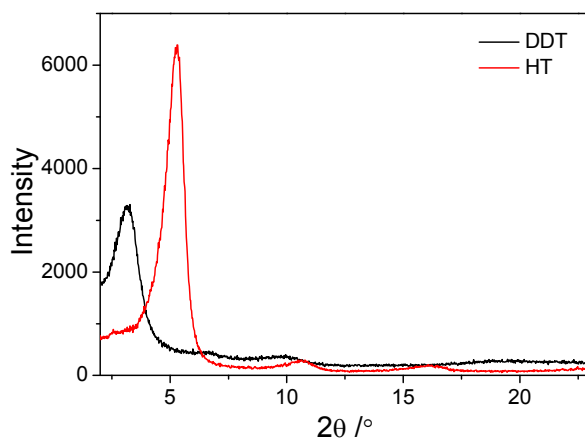

Fig. S1 XRD patterns of P3DDT and P3HT films.
